# Supplementary material for: Obamacare: A bibliometric perspective
Source: PubMed Central journal article supplement (PMC9416003; doi:10.3389/fpubh.2022.979064), 2022-08-12
Supplement: Image_1.pdf [file Image_1.pdf]

Appendix

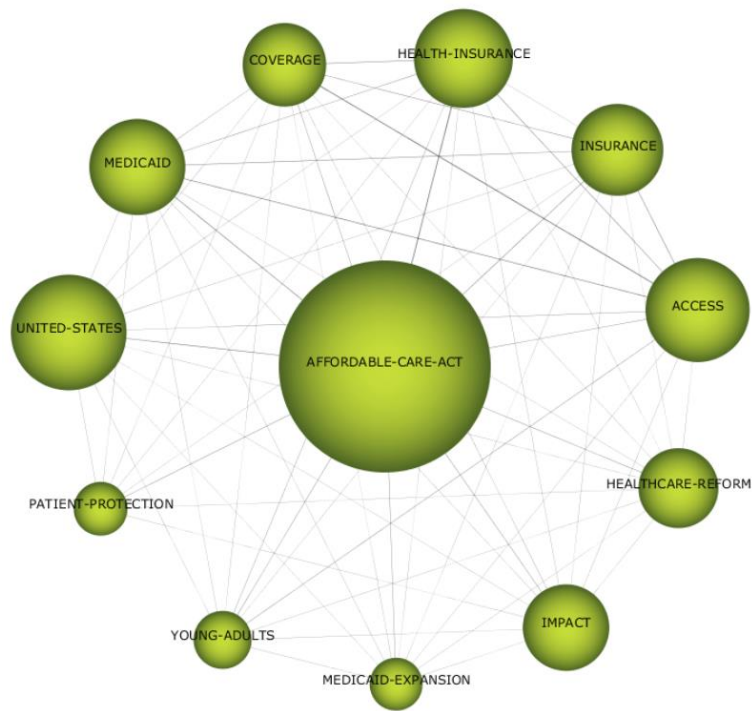

Figure 10. The AFFORDABLE-CARE-ACT thematic network.

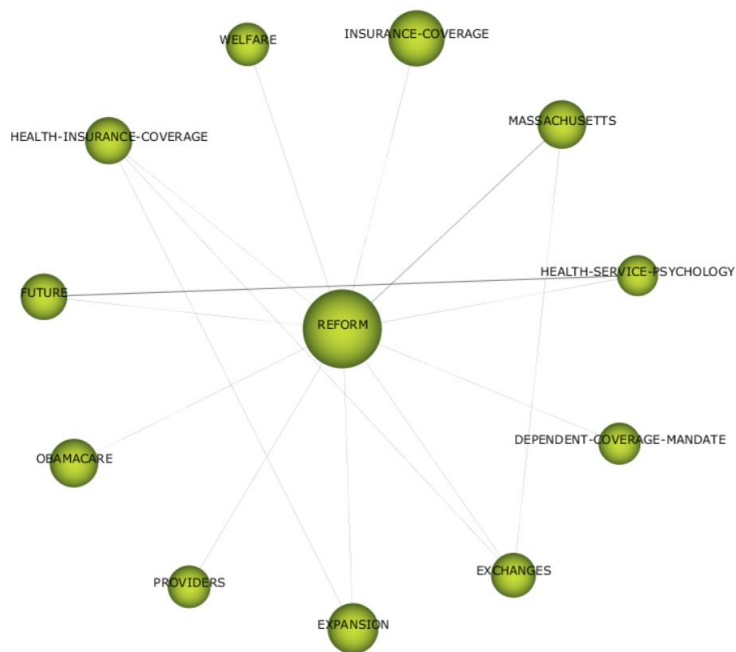

Figure 11. The REFORM thematic network.

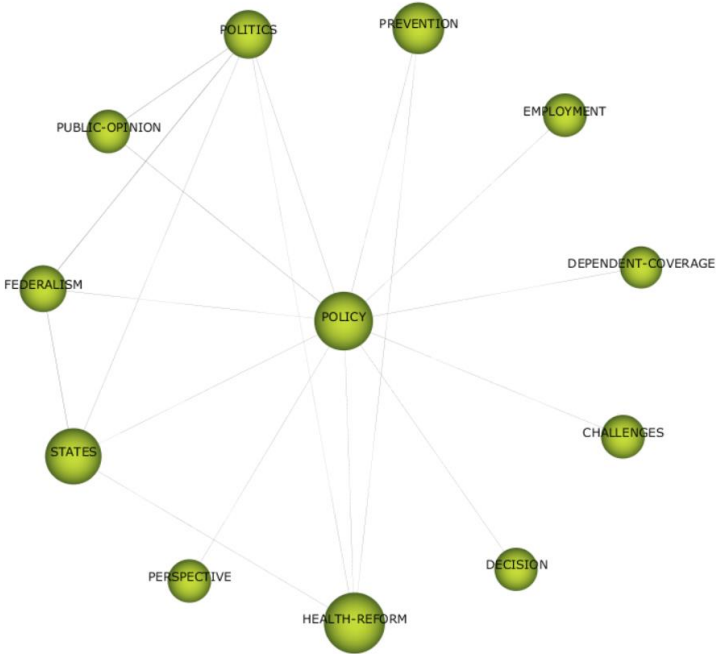

Figure 12. The POLICY thematic network.

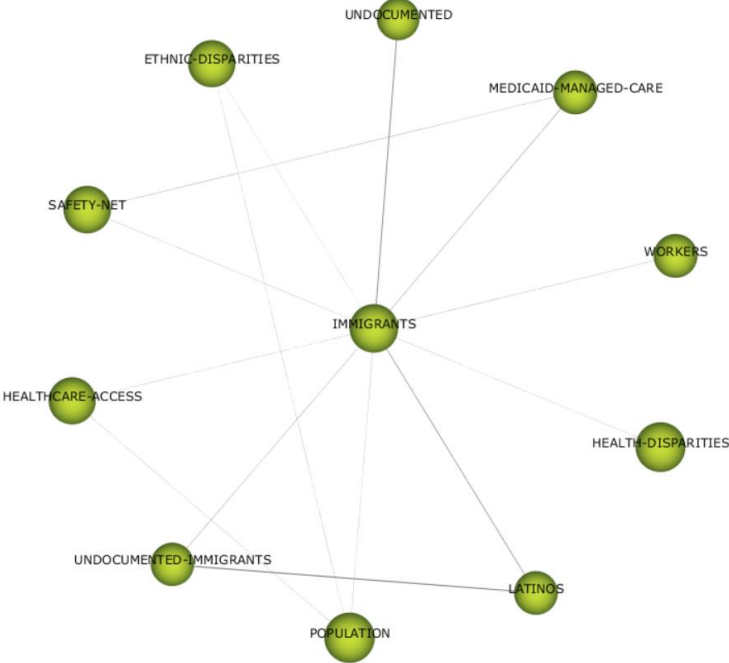

Figure 13. The IMMIGRANTS thematic network.

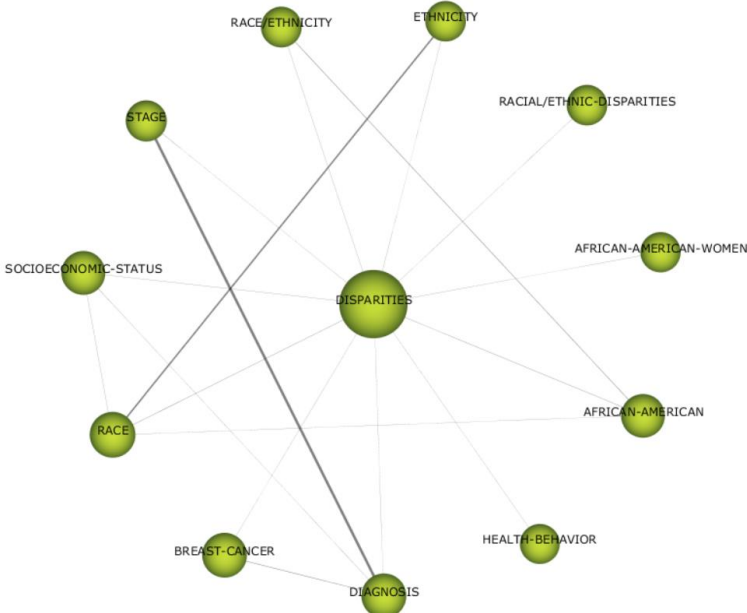

Figure 14. The DISPARITIES thematic network.

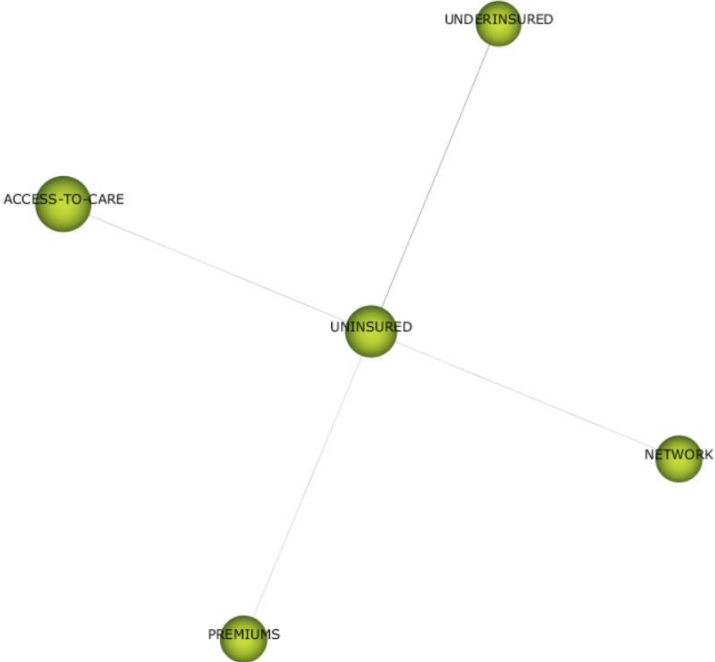

Figure 15. The UNINSURED thematic network.

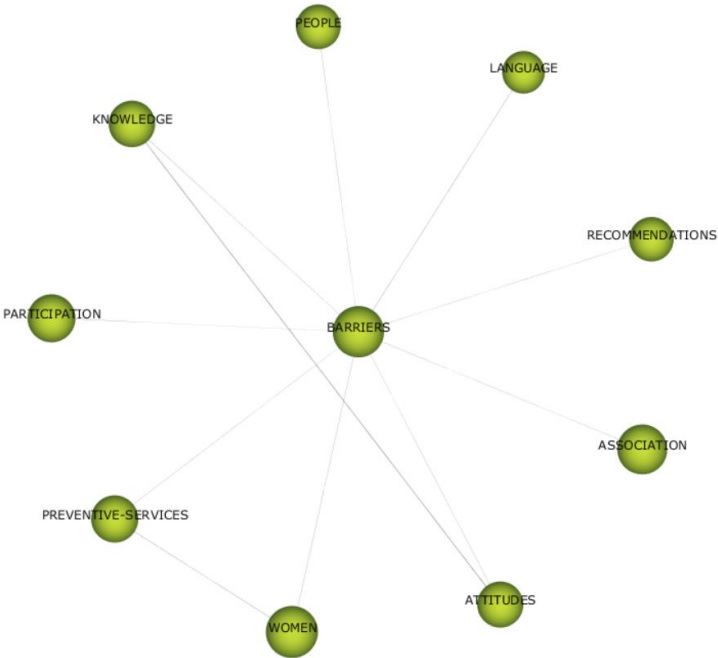

Figure 1. The BARRIERS thematic network.

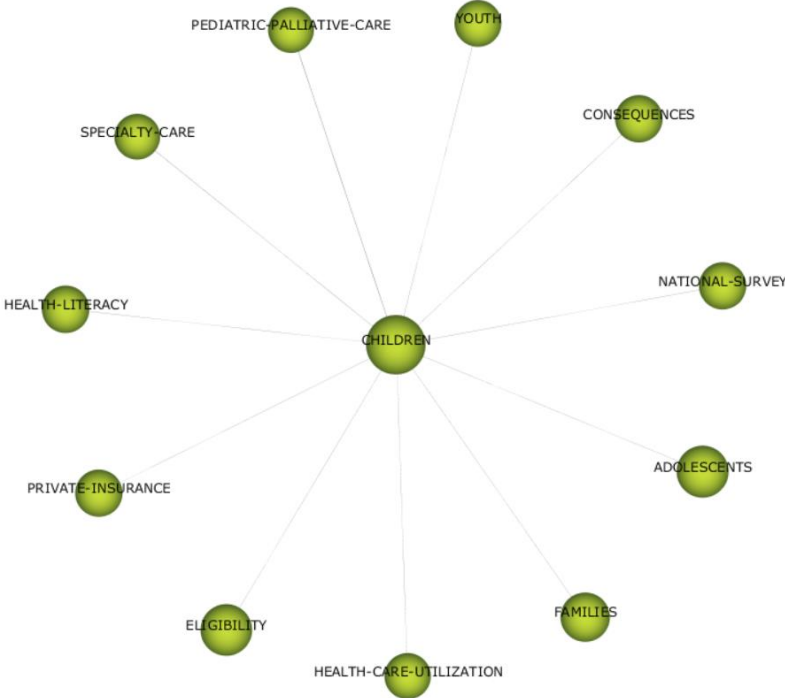

Figure 2. The CHILDREN thematic network.

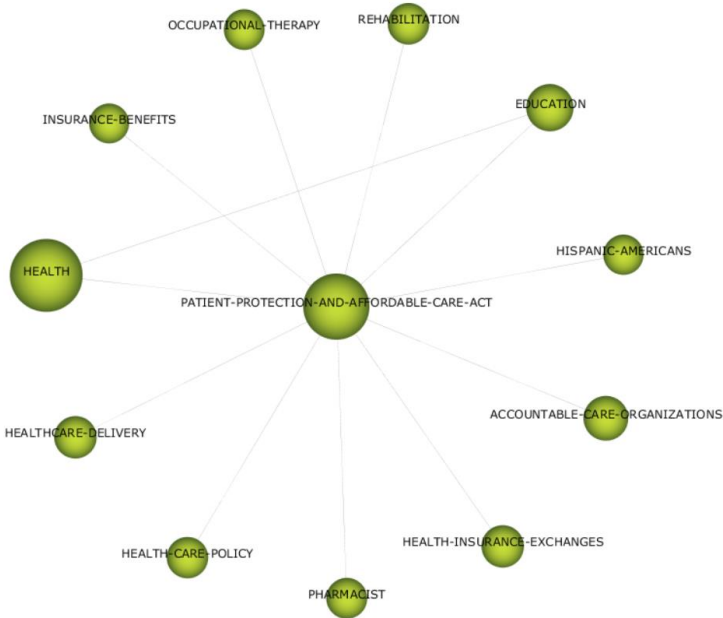

Figure 3. The PATIENT-PROTECTION-AND-AFFORDABLE-CARE-ACT thematic network.

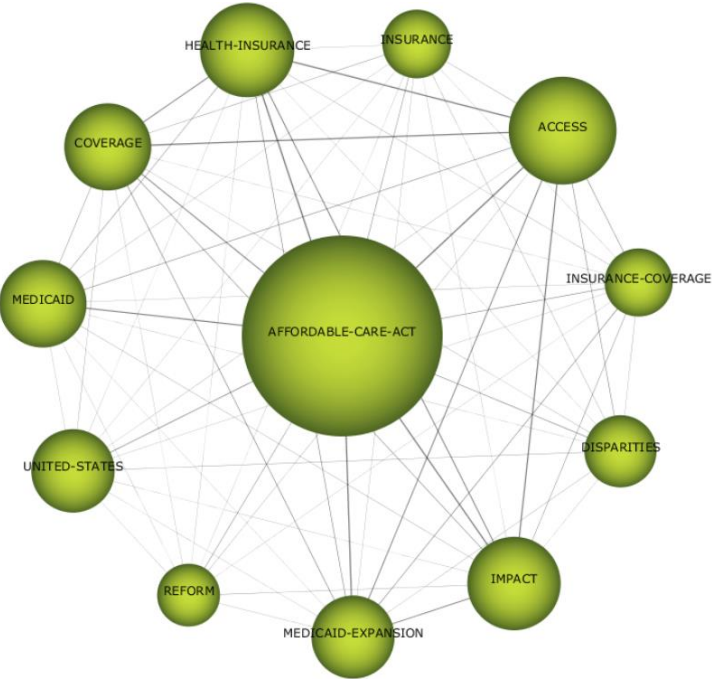

Figure 19. The AFFORDABLE-CARE-ACT thematic network.

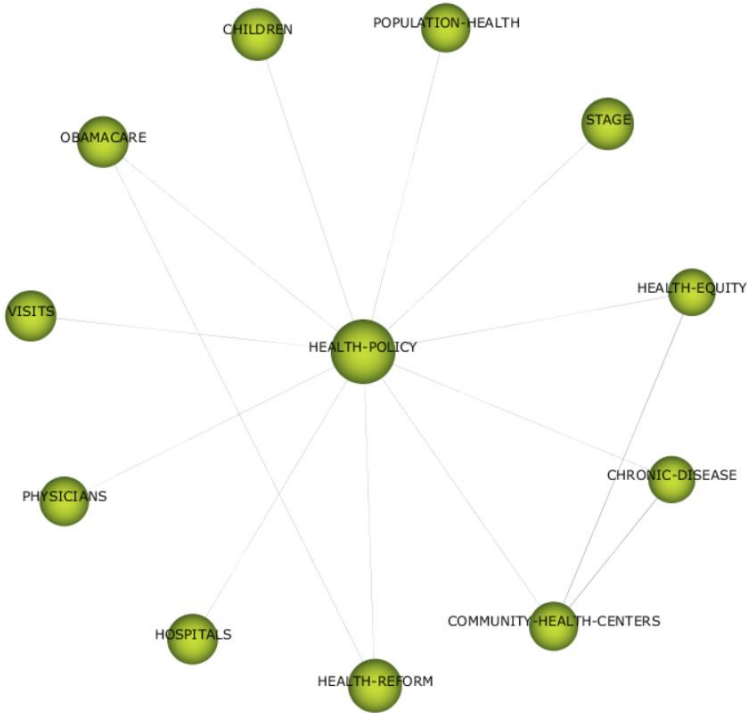

Figure 20. The HEALTH-POLICY thematic network from the “2018-2021” period.

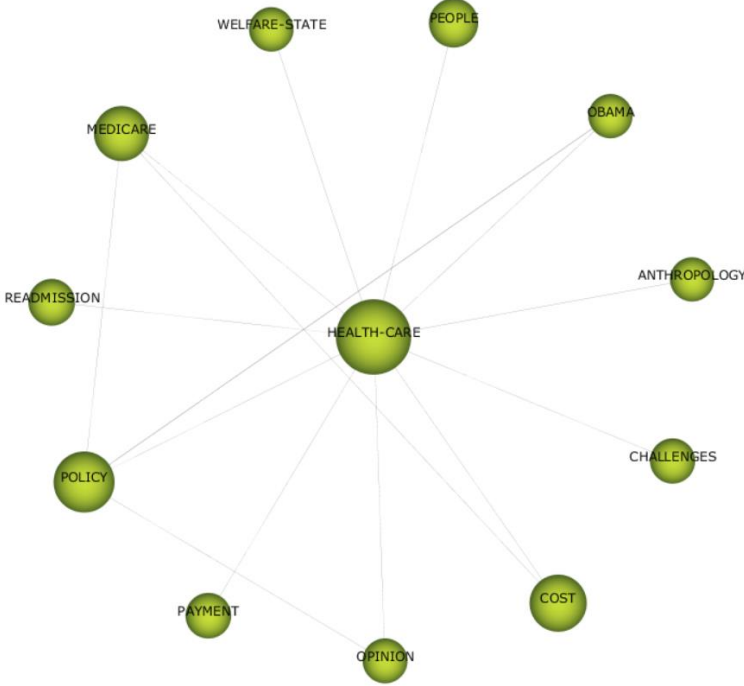

Figure 21. The HEALTH-CARE thematic network.

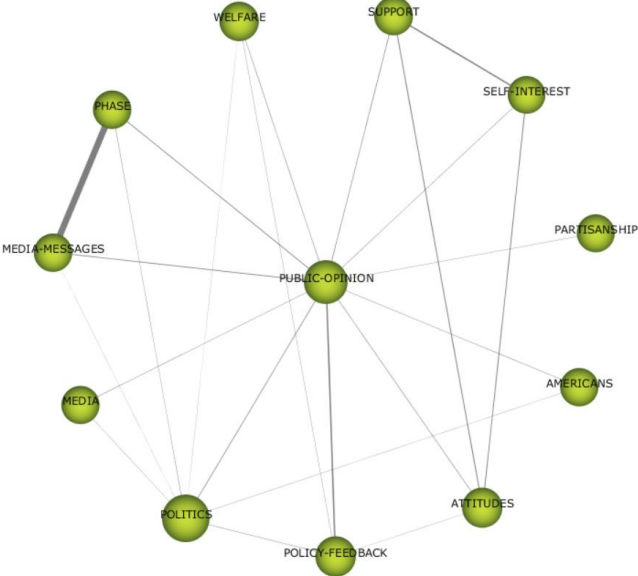

Figure 22. The PUBLIC-OPINION thematic network.

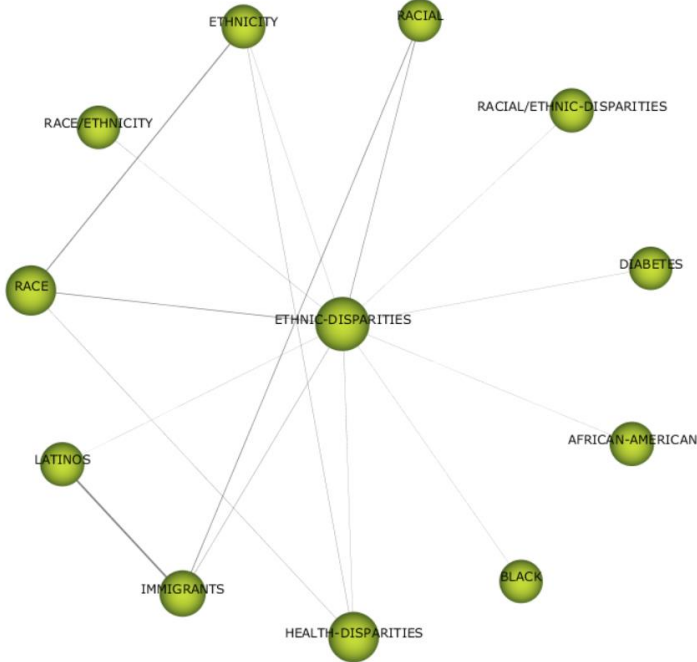

Figure 23. The ETHNIC-DISPARITIES thematic network.

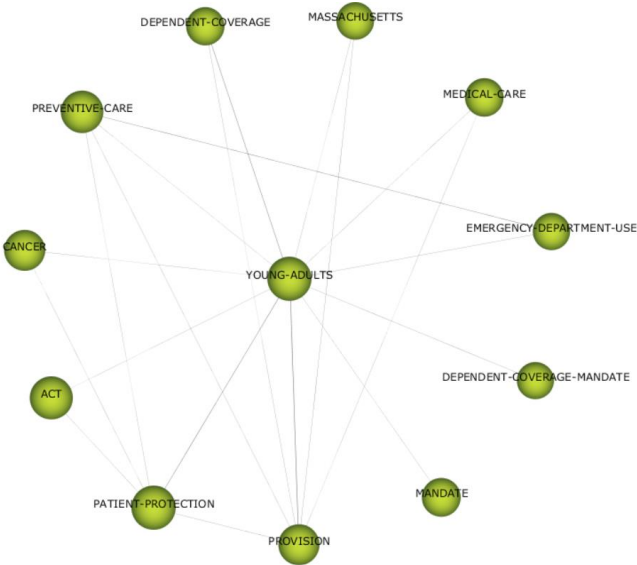

Figure 24. The YOUNG-ADULTS thematic network.

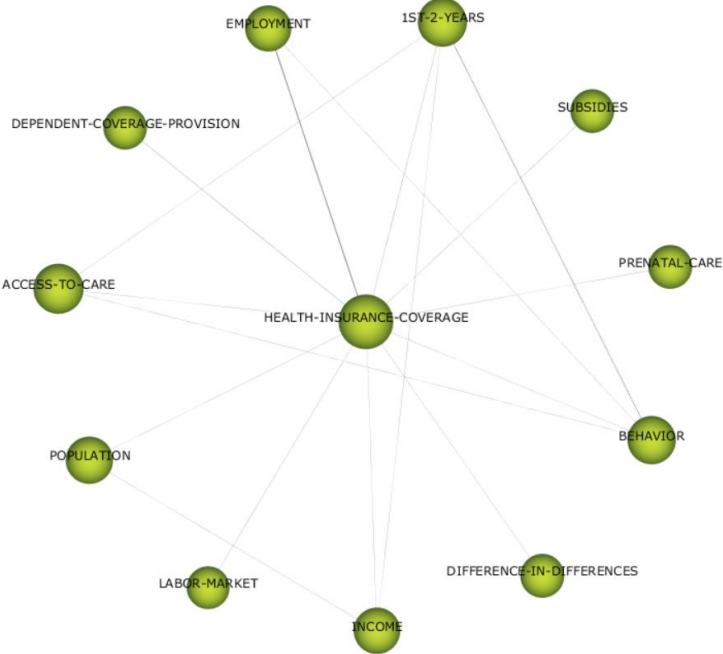

Figure 25. The HEALTH-INSURANCE-COVERAGE thematic network.



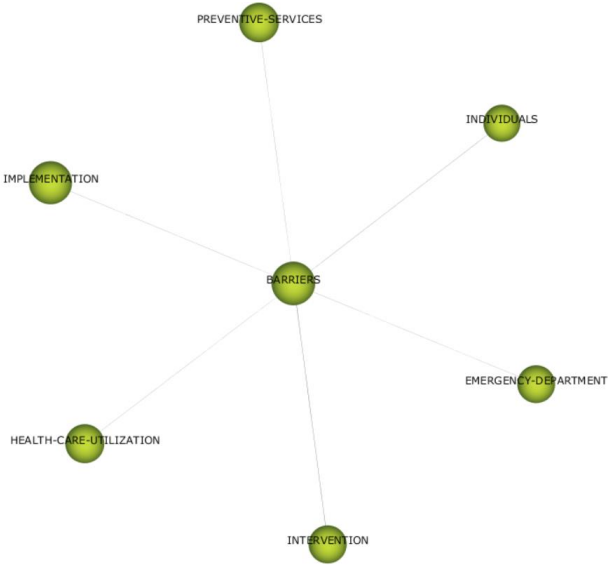

Figure 26. The BARRIERS thematic network.

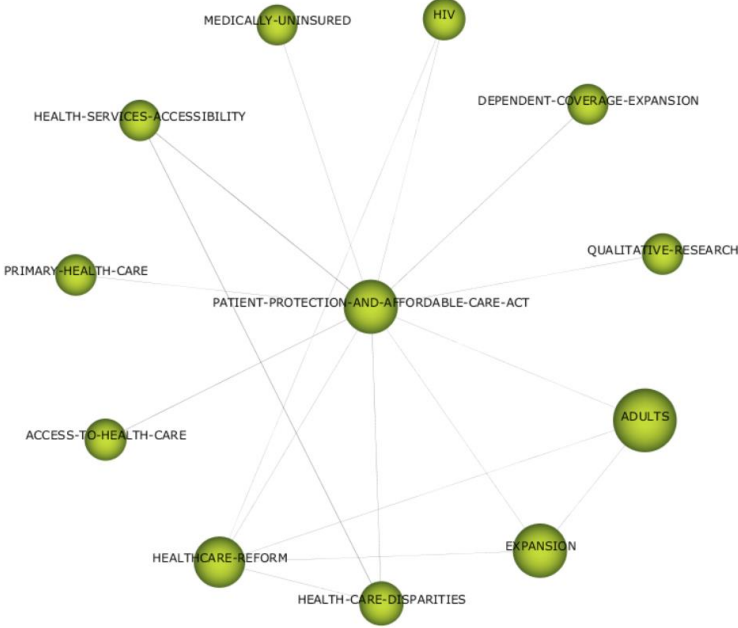

Figure 4. The PATIENT-PROTECTION-AND-AFFORDABLE-CARE-ACT thematic network.

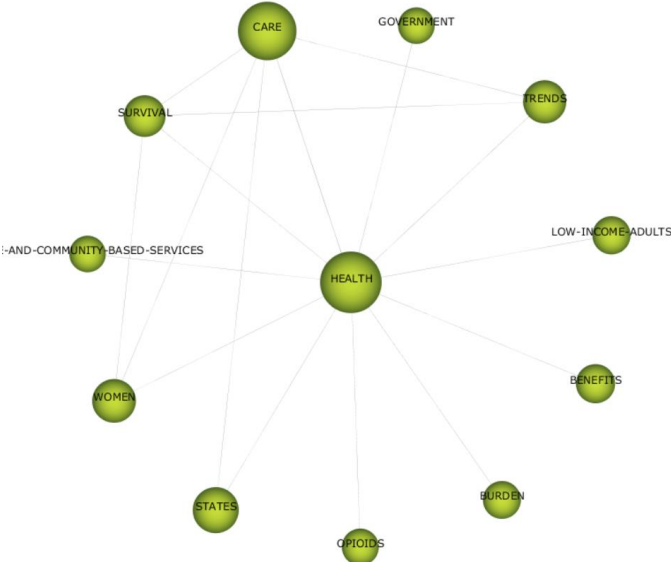

Figure 28 The HEALTH thematic network.

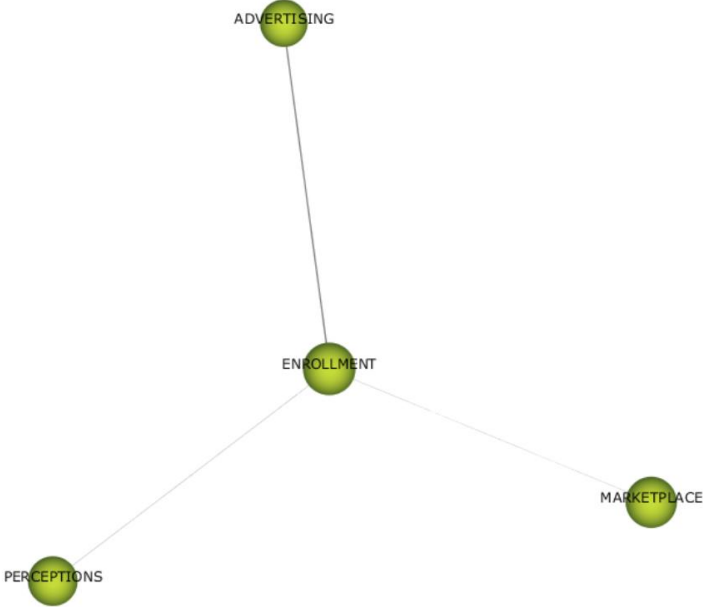

Figure 29. The ENROLLMENT thematic network.

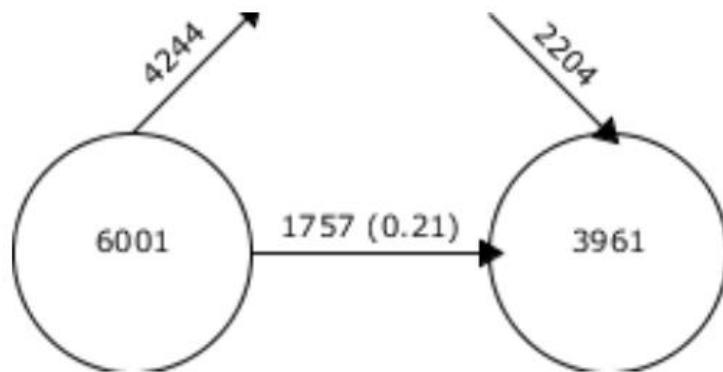

**Figure 30.** Overlap diagram from the period “Until 2017” to the period “2018-2021”.

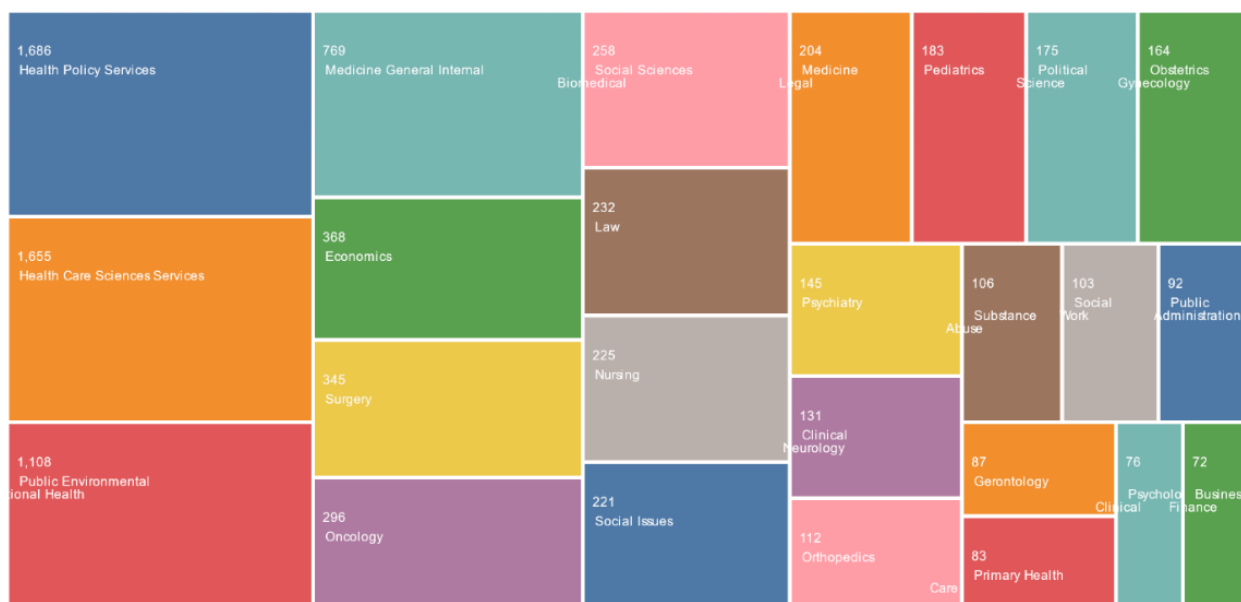

**Figure 31.** Areas of publications on the analyzed topic.

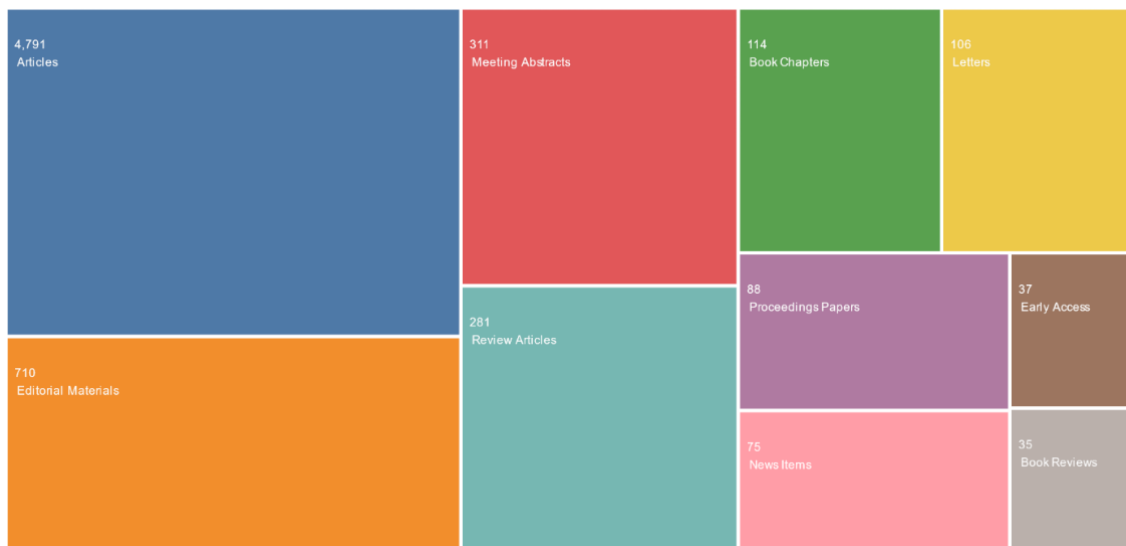

**Figure 32.** Types of publications on the analyzed topic.

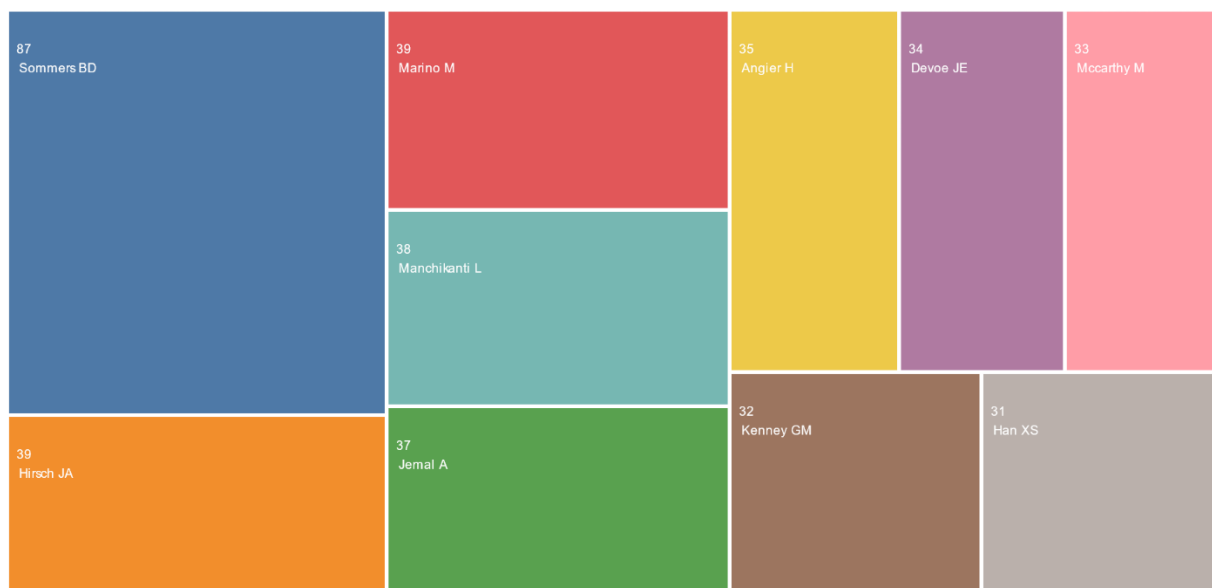

**Figure 33.** Authors with the highest number of publications on the analyzed topic.

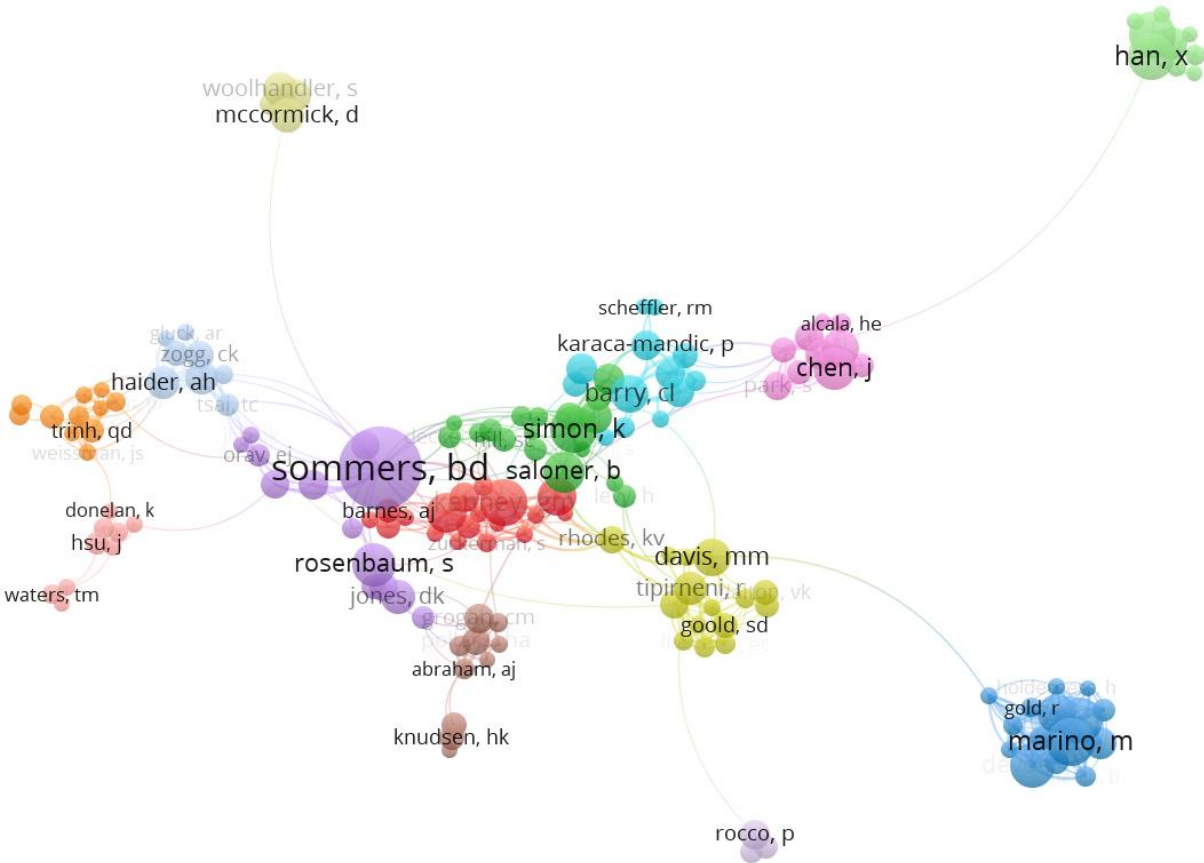

Figure 34. Network of co-authorships of the most important authors of the analyzed topic.

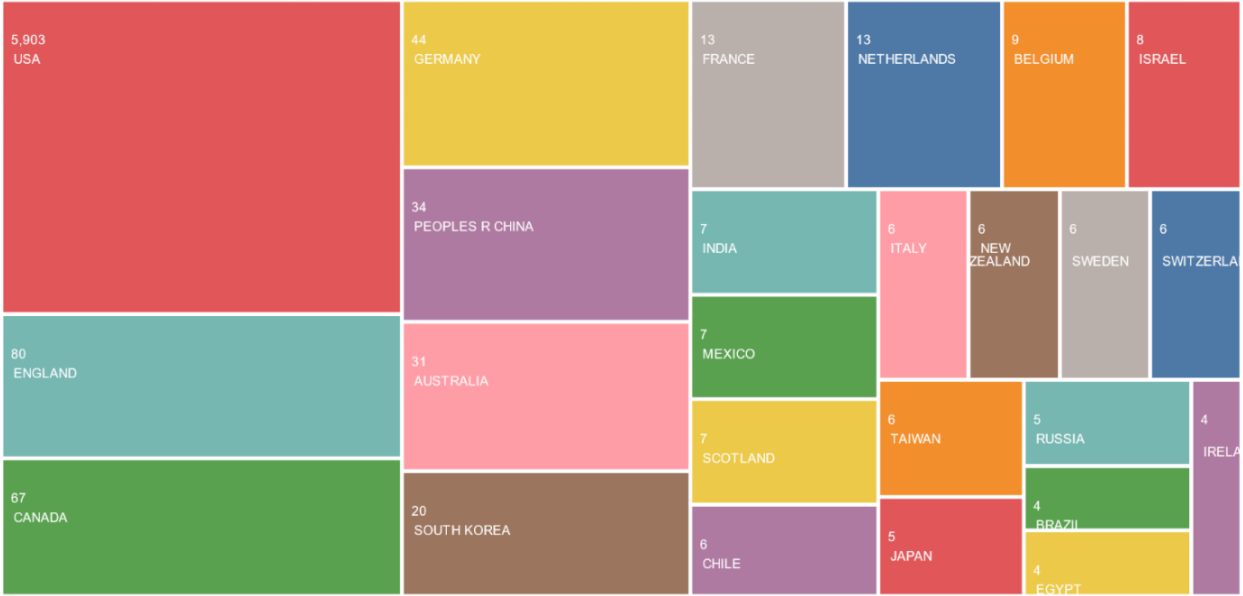

Figure 5. Countries with the highest number of publications on the analyzed topic.

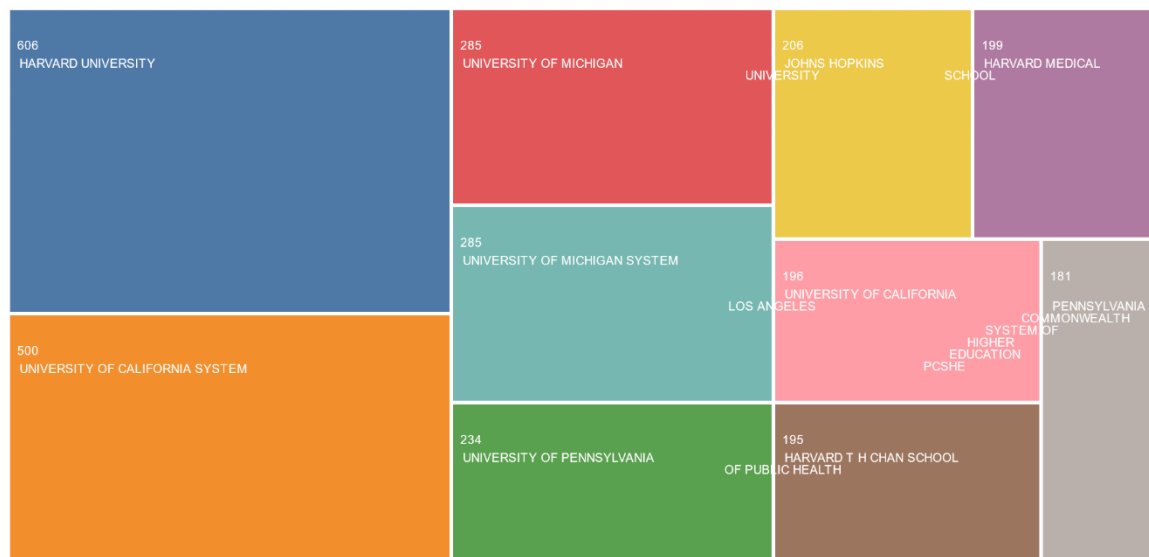

**Figure 36.** Organizations with the highest number of publications on the analyzed topic.

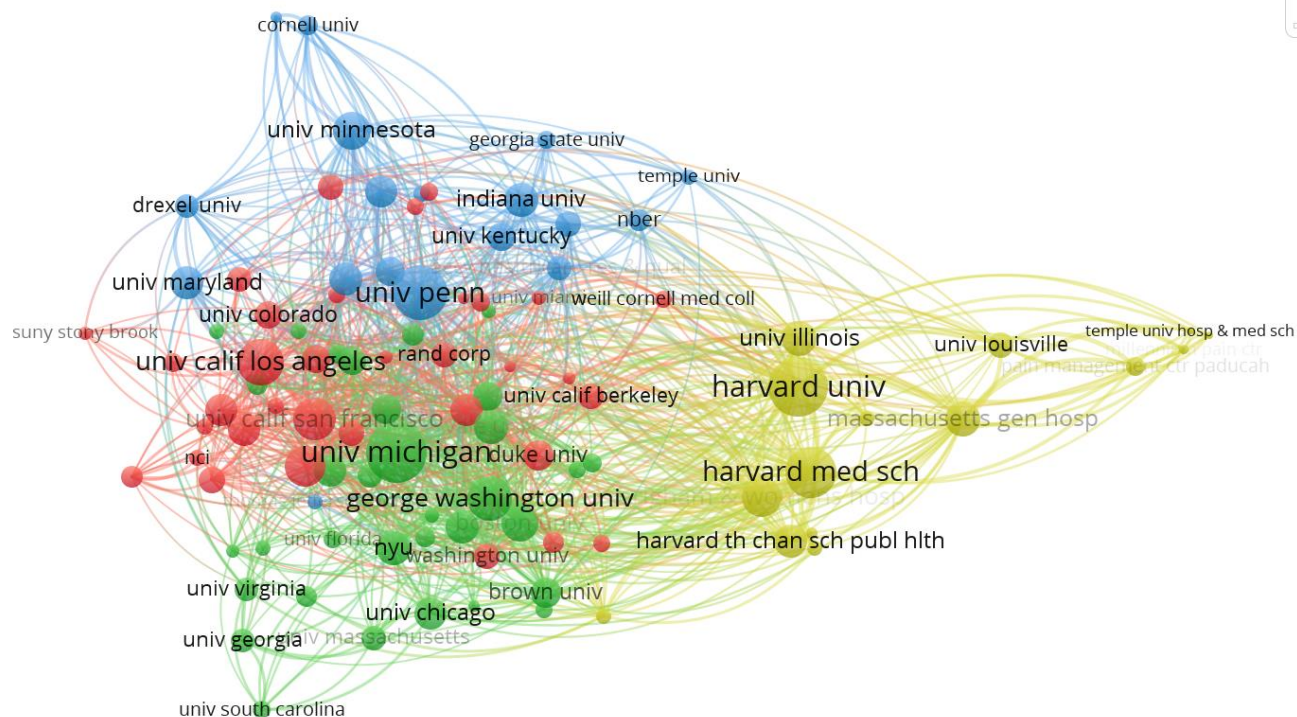

**Figure 37.** Organization analysis by author.
